# Supplementary material
Source: Springer Nature journal article supplement (https://www.springermedizin.de/resource/supplementary/12958_2011_890_MOESM1_ESM.pdf/9568738)

A

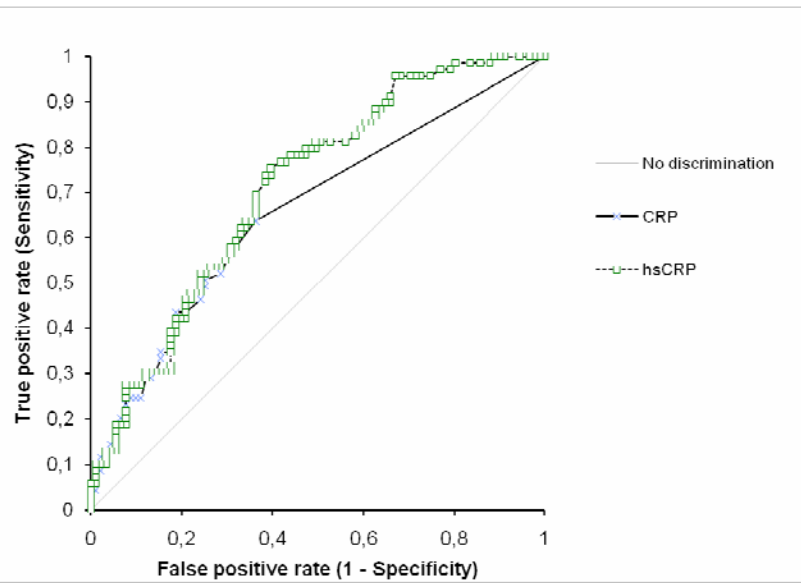

B

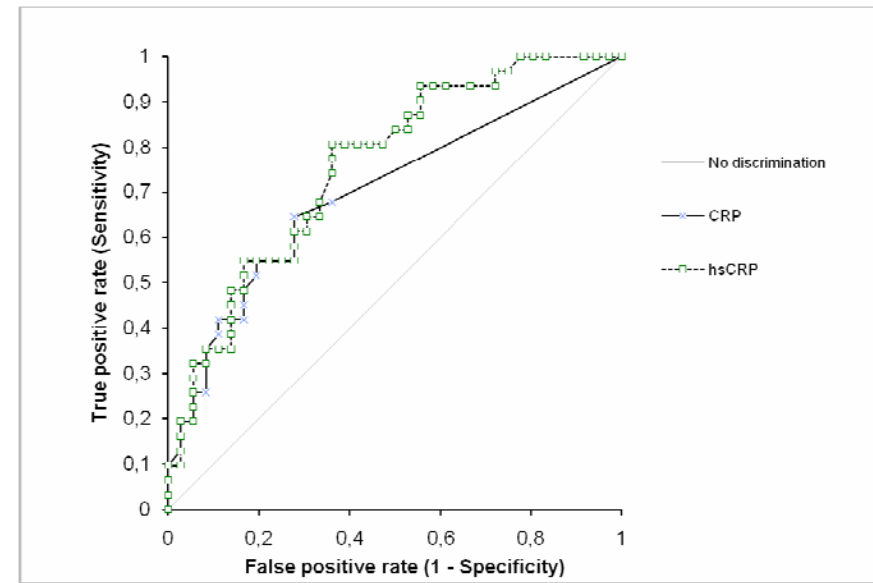

C

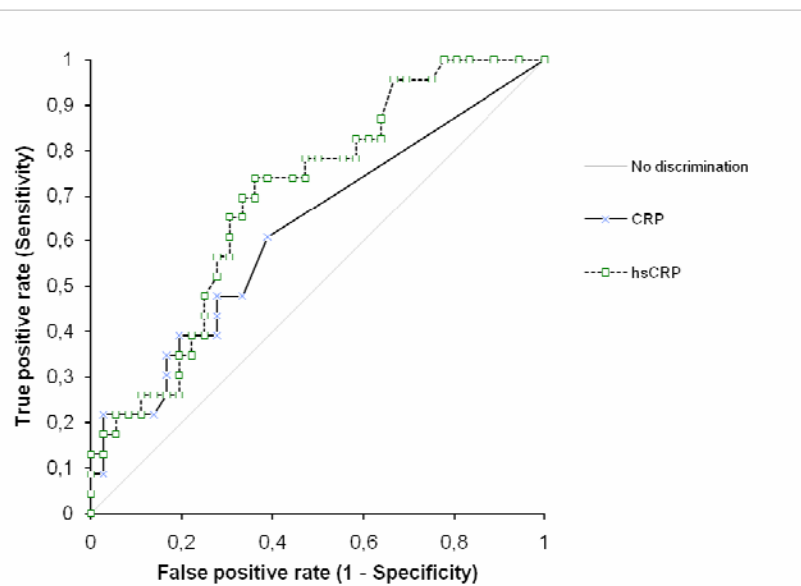

D

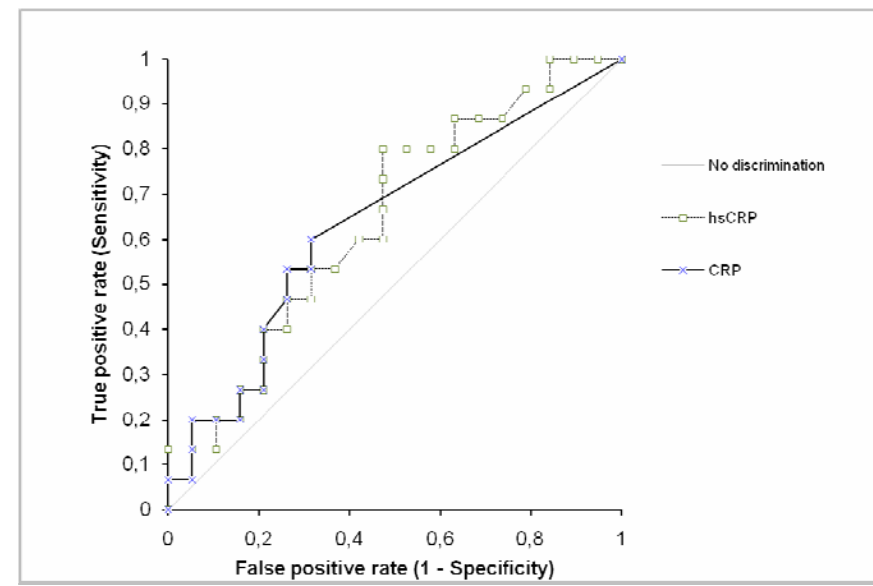

Supplement: MOESM1 [file 9568738]
